# Supplementary material for: One-pot hydrothermal preparation of capsule-like nanocomposites of C/Ce-co-doped ZnO supported on graphene to enhance photodegradation
Source: Royal Society of Chemistry journal article supplement (doi:10.1039/d2nj04937f), 2023-01-01
Supplement: d2nj04937f1.pdf [file d2nj04937f1.pdf]

Supplementary document for

**One-pot hydrothermal preparation of capsule-like nanocomposites of C/Ce-co-doped ZnO supported on graphene to enhance photodegradation**

Ha Luu<sup>1</sup>, Nguyen Bac<sup>2,3</sup>, Nguyen Chi<sup>2</sup>, Pham Chuc<sup>2</sup>, Duong Lim<sup>4</sup>, Le Hung<sup>3,5</sup>, Nguyen Mai<sup>6</sup>, Vu Chau Minh<sup>3,5</sup>, Pham Nghia<sup>7,8</sup>, Dao Nhiem Ngoc<sup>2,3</sup>, Nguyen Kien<sup>2,\*</sup>

<sup>1</sup>Faculty of Chemical Engineering, Industrial University of Ho Chi Minh City, 700000, Vietnam

<sup>2</sup>Institute of Materials Science, Vietnam Academy of Science and Technology, 18 Hoang Quoc Viet, Cau Giay, Hanoi 100000, Vietnam.

<sup>3</sup>Graduate University of Science and Technology, Vietnam Academy of Science and Technology, 18 Hoang Quoc Viet, Cau Giay, Hanoi 100000, Vietnam.

<sup>4</sup>Institute of Geography, Vietnam Academy of Science and Technology, 18 Hoang Quoc Viet, Cau Giay, Hanoi 100000, Vietnam.

<sup>5</sup>Vietnam - Russian Tropical Centre, 63 Nguyen Van Huyen, Cau Giay, Hanoi 100000, Vietnam.

<sup>6</sup>Faculty of Natural Sciences, Quy Nhon University, 170 An Duong Vuong, Quy Nhon, Binh Dinh 590000, Vietnam

<sup>7</sup>Institute of Environmental Engineering and Management, University of Witten/Herdecke, Alfred-Herrhausen-Str. 44, 58455 Witten, Germany

<sup>8</sup>Faculty of Chemistry, VNU University of Science, 19 Le Thanh Tong, Hoan Kiem, Hanoi

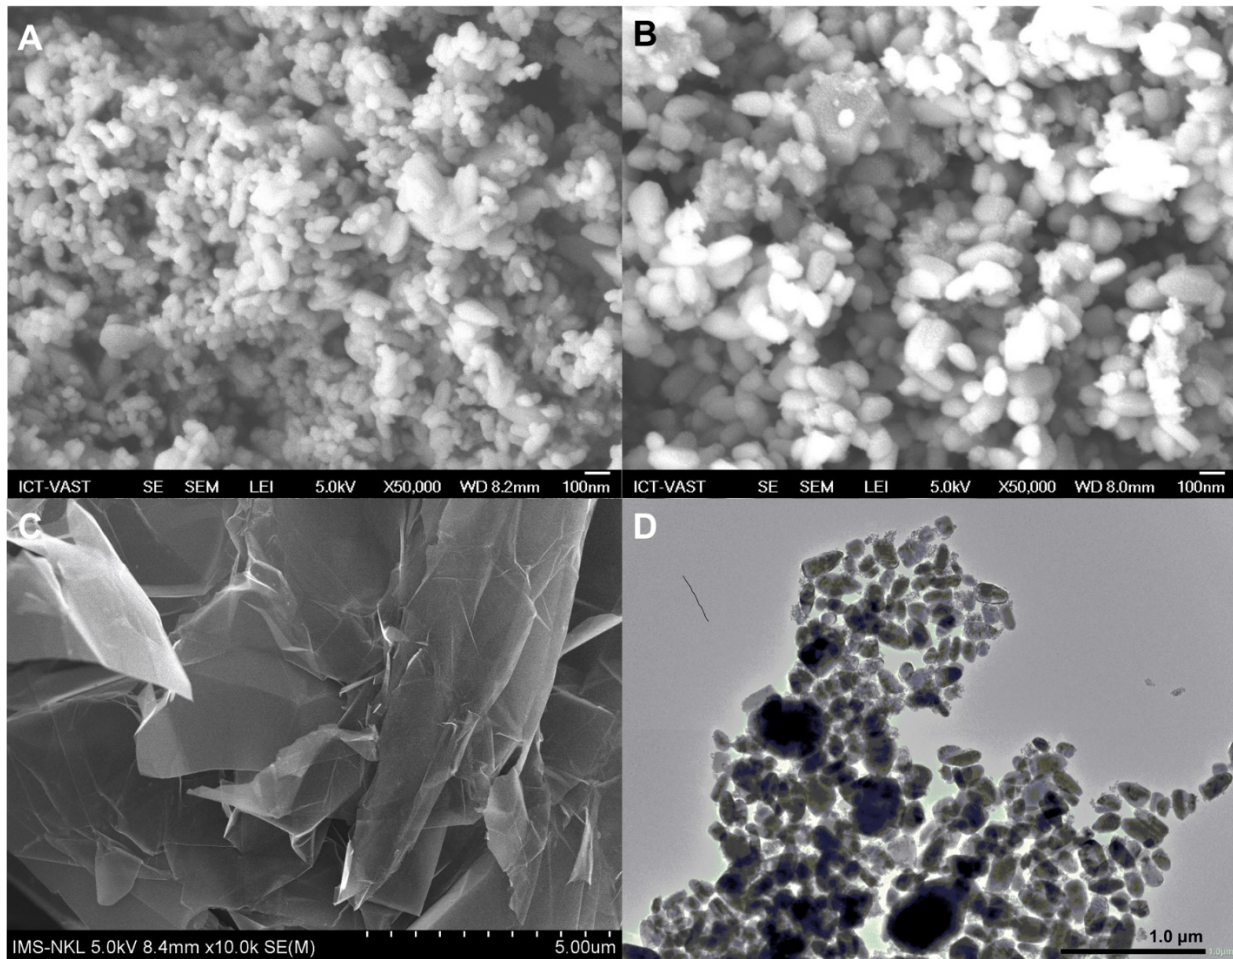

Figure S1. SEM images of (A) ZnO, (B) C/Ce-ZnO, and (C) graphene. (E) HR-TEM image of CCZG.

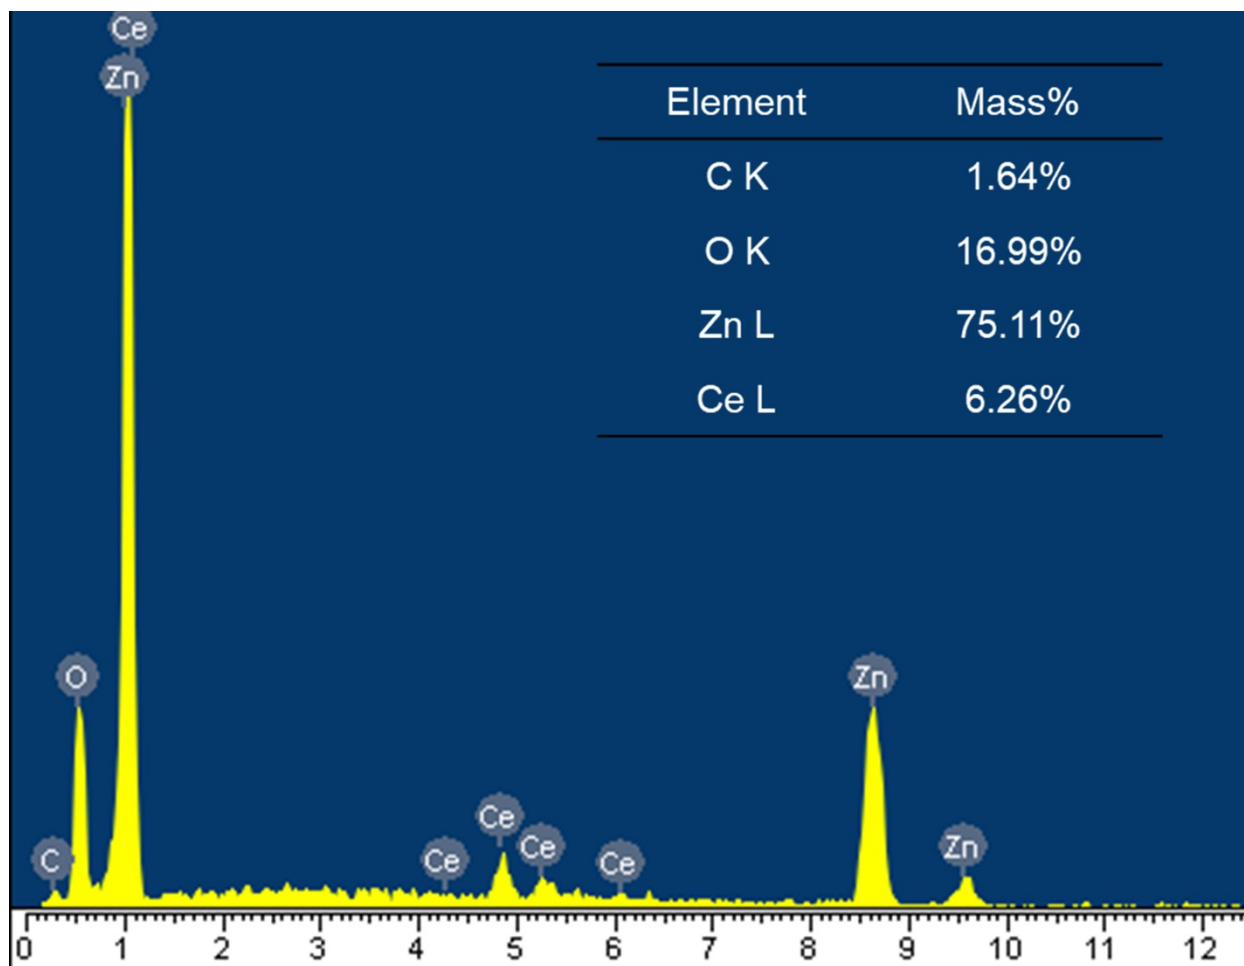

Figure S2. EDX spectra of C/Ce-ZnO materials. Inset tables: Elemental analysis of corresponding materials.
